# Supplementary material for: Personalised Tasted Masked Chewable 3D Printed Fruit-Chews for Paediatric Patients
Source: MDPI journal article supplement (doi:10.3390/pharmaceutics13081301), 2021-08-20
Supplement: s1 [file s1]

# Supplementary Materials: Personalised Tasted Masked Chewable 3D Printed Fruit-Chews for Paediatric Patients

Atabak Ghanizadeh Tabriz, Daniel Henri George Fullbrook, Lilian Vilain, Youri Derrar, Uttom Nandi, Clara Grau, Anaïs Morales, Gemma Hooper, Zoltan Hiezl and Dennis Douroumis

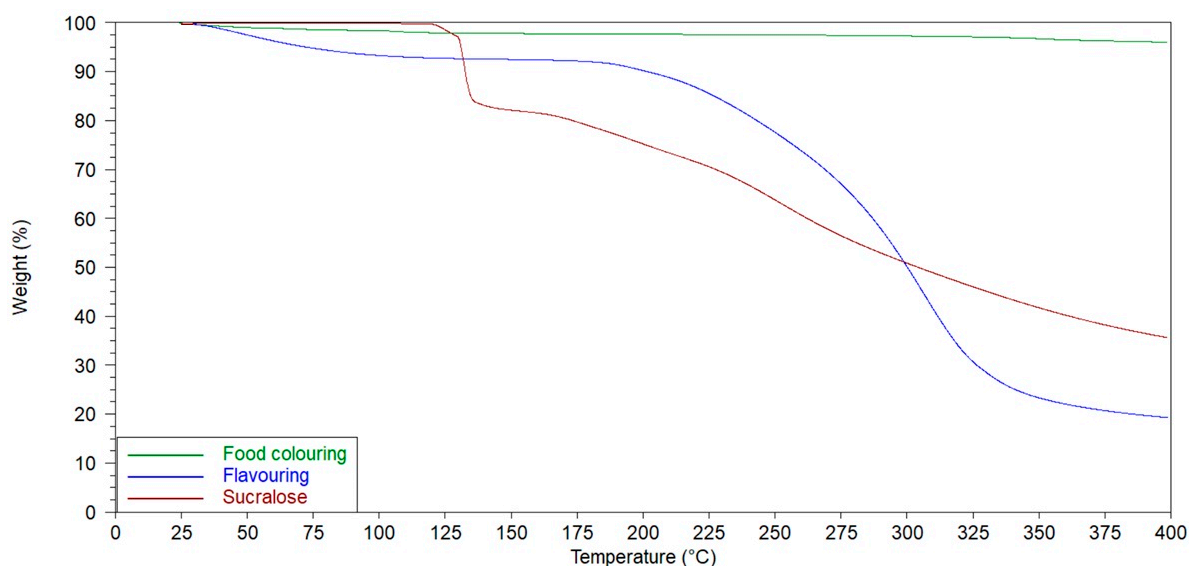

**Figure S1.** TGA thermograms of food colouring, straweerry falvour and sucralose.

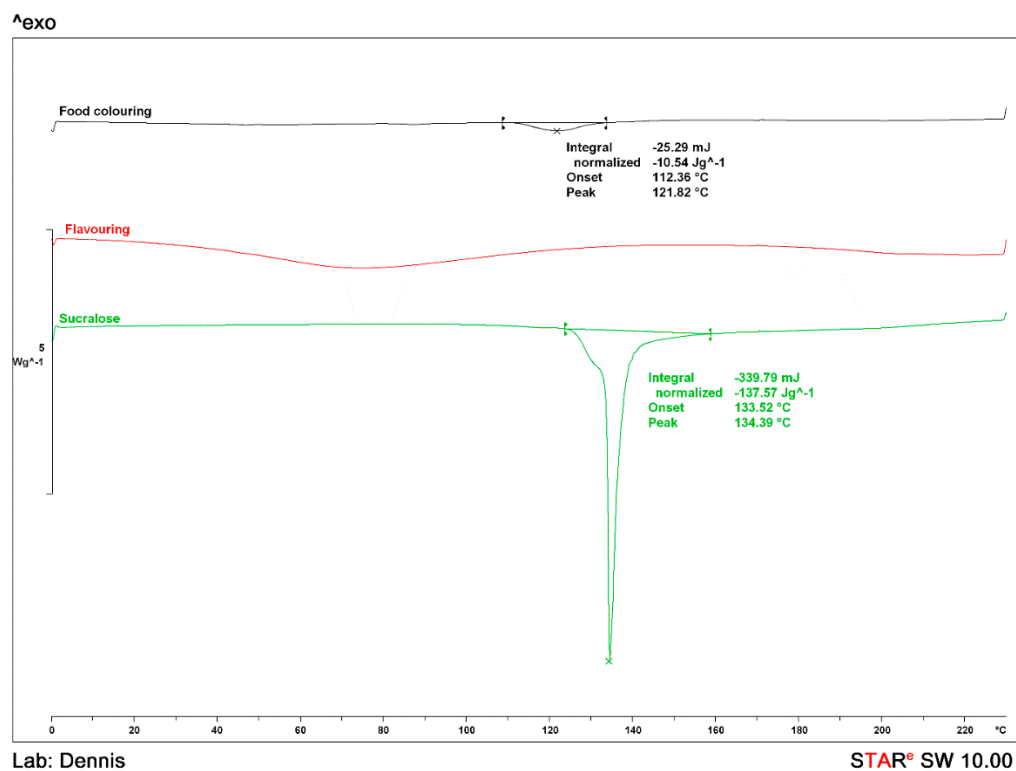

Lab: Dennis

STAR<sup>®</sup> SW 10.00

**Figure S2.** DSC thermogras of food colouring, straweerry falvour and sucralose.

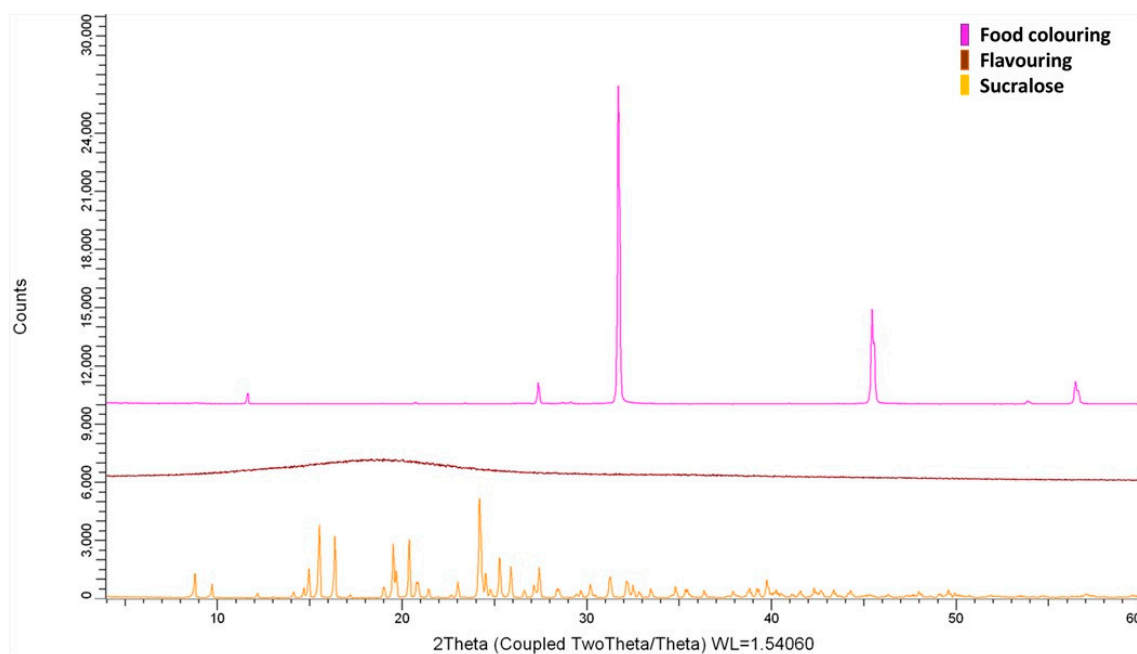

**Figure S3.** XRD patterns of food colouring, strawberry flavour and sucralose.
